# Supplementary material for: Comprehensive characterization of Fidgetin on tumor immune microenvironment evaluation and immunotherapy in human hepatocellular carcinoma
Source: publisher site journal article supplement (doi:10.18632/aging.205598), 2024-02-27
Supplement: Supplementary file [file aging-v16i5-205598-supplementary-material-SD3.pdf]

**SUPPLEMENTARY TABLES**

**Supplementary Table 1. Clinical characteristics of the hepatocellular carcinoma patients.**

| Characteristics                 | Total<br>(N=339) | FIGN expression |                | P-value |
|---------------------------------|------------------|-----------------|----------------|---------|
|                                 |                  | High<br>(N=196) | Low<br>(N=143) |         |
| <b>Age (year)</b>               |                  |                 |                | 0.536   |
| < 65                            | 208 (61.4%)      | 123 (62.8%)     | 85 (59.4%)     |         |
| ≥ 65                            | 131 (38.6%)      | 73 (37.2%)      | 58 (40.6%)     |         |
| <b>Gender</b>                   |                  |                 |                | 0.074   |
| Male                            | 231 (68.1%)      | 126 (64.3%)     | 105 (73.4%)    |         |
| Female                          | 108 (31.9%)      | 70 (35.7%)      | 38 (26.6%)     |         |
| <b>Family history of cancer</b> |                  |                 |                | 0.671   |
| NO                              | 196 (57.8%)      | 116 (59.2%)     | 80 (55.9%)     |         |
| YES                             | 98 (28.9%)       | 53 (27.0%)      | 45 (31.5%)     |         |
| Unknown                         | 45 (13.3%)       | 27 (13.8%)      | 18 (12.6%)     |         |
| <b>TNM stage</b>                |                  |                 |                | 0.928   |
| I                               | 170 (50.1%)      | 98 (50.0%)      | 72 (50.3%)     |         |
| II                              | 84 (24.8%)       | 47 (24.0%)      | 37 (25.9%)     |         |
| III                             | 81 (23.9%)       | 49 (25.0%)      | 32 (22.4%)     |         |
| IV                              | 4 (1.2%)         | 2 (1.0%)        | 2 (1.4%)       |         |
| <b>Histologic grade</b>         |                  |                 |                | 0.431   |
| G1–G2                           | 212 (62.5%)      | 120 (61.2%)     | 92 (64.3%)     |         |
| G3–G4                           | 125 (36.9%)      | 74 (37.8%)      | 51 (35.7%)     |         |
| Unknown                         | 2 (0.6%)         | 2 (1.0%)        | 0 (0%)         |         |
| <b>Ishak score</b>              |                  |                 |                | <0.001  |
| 0–4                             | 124 (36.6%)      | 63 (32.1%)      | 61 (42.7%)     |         |
| 5–6                             | 74 (21.8%)       | 33 (16.8%)      | 41 (28.7%)     |         |
| Unknown                         | 141 (41.6%)      | 100 (51.0%)     | 41 (28.7%)     |         |
| <b>Child–Pugh grade</b>         |                  |                 |                | 0.019   |
| A                               | 207 (61.1%)      | 110 (56.1%)     | 97 (67.8%)     |         |
| B-C                             | 21 (6.2%)        | 10 (5.1%)       | 11 (7.7%)      |         |
| Unknown                         | 111 (32.7%)      | 76 (38.8%)      | 35 (24.5%)     |         |
| <b>Vascular invasion</b>        |                  |                 |                | 0.113   |
| None                            | 193 (56.9%)      | 104 (53.1%)     | 89 (62.2%)     |         |
| Micro                           | 84 (24.8%)       | 48 (24.5%)      | 36 (25.2%)     |         |
| Macro                           | 14 (4.1%)        | 9 (4.6%)        | 5 (3.5%)       |         |
| Unknown                         | 48 (14.2%)       | 35 (17.9%)      | 13 (9.1%)      |         |
| <b>Alpha fetoprotein</b>        |                  |                 |                | 0.008   |
| Negative                        | 143 (42.2%)      | 69 (35.2%)      | 74 (51.7%)     |         |
| Positive                        | 120 (35.4%)      | 76 (38.8%)      | 44 (30.8%)     |         |
| Unknown                         | 76 (22.4%)       | 51 (26.0%)      | 25 (17.5%)     |         |
| <b>Residual tumor</b>           |                  |                 |                | 0.234   |
| R0                              | 301 (88.8%)      | 171 (87.2%)     | 130 (90.9%)    |         |
| R1–R2                           | 12 (3.5%)        | 6 (3.1%)        | 6 (4.2%)       |         |
| Unknown                         | 26 (7.7%)        | 19 (9.7%)       | 7 (4.9%)       |         |

|                       |             |             |             |              |
|-----------------------|-------------|-------------|-------------|--------------|
| <b>Living status</b>  |             |             |             | <b>0.130</b> |
| Alive                 | 224 (66.1%) | 123 (62.8%) | 101 (70.6%) |              |
| Dead                  | 115 (33.9%) | 73 (37.2%)  | 42 (29.4%)  |              |
| <b>Disease status</b> |             |             |             | <b>0.432</b> |
| NO                    | 163 (48.1%) | 97 (49.5%)  | 66 (46.2%)  |              |
| YES                   | 132 (38.9%) | 71 (36.2%)  | 61 (42.7%)  |              |
| Unknown               | 44 (13.0%)  | 28 (14.3%)  | 16 (11.2%)  |              |

TNM: Tumor-Node-Metastasis.

**Supplementary Table 2. Correlation analysis between FIGN and immune cell marker gene in TIMER, GEPIA2 and TCGA.**

| Description             | Gene markers | TIMER  |          | GEPIA2 |          | TCGA   |          |
|-------------------------|--------------|--------|----------|--------|----------|--------|----------|
|                         |              | Purity |          | Tumor  |          | Tumor  |          |
|                         |              | rho    | P        | rho    | P        | rho    | P        |
| B cell                  | CD19         | 0.169  | 1.56e-03 | 0.220  | 2.40e-07 | 0.245  | 3.40e-07 |
|                         | MS4A1        | 0.215  | 5.59e-05 | 0.370  | 2.80e-18 | 0.245  | 3.30e-07 |
|                         | CD79A        | 0.197  | 2.28e-04 | 0.160  | 2.20e-04 | 0.236  | 8.70e-07 |
| CD8 <sup>+</sup> T Cell | CD8A         | 0.255  | 1.60e-06 | 0.110  | 1.40e-02 | 0.250  | 2.00e-07 |
|                         | CD8B         | 0.203  | 1.44e-04 | 0.075  | 8.60e-02 | 0.235  | 9.90e-07 |
|                         | IL2RA        | 0.308  | 4.67e-09 | -0.003 | 9.50e-01 | 0.241  | 5.30e-07 |
| Tfh                     | CXCR3        | 0.253  | 1.79e-06 | -0.063 | 1.50e-01 | 0.262  | 4.90e-08 |
|                         | CXCR5        | 0.220  | 3.54e-05 | 0.038  | 3.90e-01 | 0.230  | 1.60e-06 |
|                         | ICOS         | 0.322  | 8.33e-10 | 0.140  | 1.60e-03 | 0.307  | 1.10e-10 |
| Th1                     | IL12RB1      | 0.297  | 1.75e-08 | 0.093  | 3.20e-02 | 0.266  | 3.00e-08 |
|                         | CCR1         | 0.378  | 3.34e-13 | 0.087  | 4.50e-02 | 0.312  | 6.40e-11 |
|                         | CCR5         | 0.358  | 6.53e-12 | 0.110  | 1.40e-02 | 0.331  | 2.70e-12 |
| Th2                     | CCR4         | 0.397  | 1.75e-14 | 0.210  | 6.20e-07 | 0.361  | 1.80e-14 |
|                         | CCR8         | 0.425  | 1.24e-16 | 0.120  | 7.80e-03 | 0.320  | 1.40e-11 |
|                         | HAVCR1       | 0.399  | 1.28e-14 | 0.200  | 2.40e-06 | 0.345  | 2.70e-13 |
| Th17                    | IL21R        | 0.349  | 2.38e-11 | 0.210  | 2.50e-01 | 0.318  | 2.80e-11 |
|                         | IL23R        | 0.340  | 7.91e-11 | 0.250  | 8.30e-09 | 0.330  | 3.30e-12 |
|                         | CCR6         | 0.368  | 1.60e-12 | 0.008  | 8.50e-01 | 0.399  | <2.2e-16 |
| Treg                    | FOXP3        | 0.285  | 6.65e-08 | 0.044  | 3.20e-01 | 0.171  | 4.20e-04 |
|                         | NT5E         | 0.257  | 1.28e-06 | 0.110  | 1.10e-02 | 0.246  | 3.10e-07 |
|                         | IL7R         | 0.388  | 7.33e-14 | 0.240  | 2.60e-08 | 0.275  | 9.60e-09 |
| T cell exhaustion       | PDCD1        | 0.268  | 4.13e-07 | 0.096  | 2.80e-02 | 0.278  | 5.60e-09 |
|                         | CTLA4        | 0.260  | 9.29e-07 | 0.068  | 1.20e-01 | 0.273  | 1.10e-08 |
|                         | LAG3         | 0.254  | 1.65e-06 | 0.310  | 1.20e-13 | 0.278  | 7.00e-09 |
| M1 Macrophage           | NOS2         | 0.071  | 1.85e-01 | -0.210 | 8.70e-07 | 0.025  | 6.10e-01 |
|                         | IRF5         | 0.273  | 2.49e-07 | 0.140  | 1.70e-03 | 0.211  | 1.20e-05 |
|                         | PTGS2        | 0.303  | 9.06e-09 | 0.400  | 2.30e-21 | 0.260  | 5.60e-08 |
| M2 Macrophage           | CD163        | 0.274  | 2.36e-07 | 0.081  | 6.30e-02 | 0.232  | 1.50e-06 |
|                         | MRC1         | 0.170  | 1.50e-03 | 0.180  | 2.60e-05 | 0.138  | 4.40e-03 |
|                         | CD209        | 0.246  | 3.62e-06 | 0.004  | 9.20e-01 | 0.206  | 2.00e-05 |
| TAM                     | CCL2         | 0.195  | 2.62e-04 | 0.120  | 4.70e-03 | 0.161  | 8.70e-04 |
|                         | CD86         | 0.329  | 3.68e-10 | -0.011 | 8.00e-01 | 0.300  | 3.40e-10 |
|                         | CD68         | 0.254  | 1.72e-06 | -0.036 | 4.10e-01 | 0.193  | 6.70e-05 |
| Monocyte                | CD14         | -0.097 | 7.28e-02 | -0.210 | 2.00e-06 | -0.122 | 1.20e-02 |

|                     |         |       |          |        |          |       |          |
|---------------------|---------|-------|----------|--------|----------|-------|----------|
|                     | CD33    | 0.272 | 2.84e-07 | 0.240  | 1.80e-08 | 0.285 | 2.60e-09 |
|                     | ITGAX   | 0.344 | 4.49e-11 | 0.360  | 2.20e-17 | 0.272 | 1.50e-08 |
|                     | B3GAT1  | 0.111 | 3.93e-02 | 0.280  | 6.50e-11 | 0.124 | 1.10e-02 |
| Natural killer cell | KIR3DL1 | 0.145 | 7.07e-03 | 0.160  | 2.60e-04 | 0.125 | 9.70e-03 |
|                     | CD7     | 0.240 | 6.60e-06 | 0.160  | 2.40e-04 | 0.276 | 8.90e-09 |
|                     | FCGR3A  | 0.327 | 4.45e-10 | 0.140  | 1.20e-03 | 0.279 | 6.30e-09 |
| Neutrophil          | CD55    | 0.114 | 3.46e-02 | -0.030 | 4.90e-01 | 0.009 | 8.60e-01 |
|                     | ITGAM   | 0.311 | 3.39e-09 | 0.290  | 8.40e-12 | 0.285 | 2.60e-09 |
|                     | CD1C    | 0.254 | 1.65e-06 | -0.003 | 9.60e-01 | 0.272 | 1.30e-08 |
| Dendritic cell      | THBD    | 0.178 | 8.84e-04 | 0.130  | 2.00e-03 | 0.122 | 1.20e-02 |
|                     | NRP1    | 0.345 | 4.42e-11 | 0.016  | 7.20e-01 | 0.233 | 1.30e-06 |

---
